# Supplementary material for: Porous hollow carbon nanospheres embedded with well-dispersed cobalt monoxide nanocrystals as effective polysulfide reservoirs for high-rate and long-cycle lithium–sulfur batteries
Source: Royal Society of Chemistry journal article supplement (doi:10.1039/c7ta05120d), 2017-01-01
Supplement: c7ta05120d1.pdf [file c7ta05120d1.pdf]

Porous Hollow Carbon Nanospheres Embedded with Well-Dispersed  
Cobalt Monoxide Nanocrystals as Effective Polysulfide Reservoirs for  
High-Rate and Long-Cycle Lithium-Sulfur Batteries

Shikui Wu,<sup>\*#a</sup> Yingze Wang,<sup>#b</sup> Shengsang Na,<sup>\*c</sup> Chaojun Chen,<sup>a</sup> Tengfei Yu,<sup>a</sup> Huanyun  
Wang,<sup>a</sup> and Huimin Zang,<sup>a</sup>

<sup>a</sup> College of Pharmacy, Inner Mongolia Medical University, No.5 Xinhua west street,  
Hohhot 010059, PR China. \*E-mail: shikuiwu@yahoo.com, Fax:+86 04716653172,  
Tel: +86 04716653172.

<sup>b</sup>. College of biological science and engineering, Hebei university of science and  
technology, No.26 Yuxiang street, Shijiazhuang, Hebei, P.R. China 050018

<sup>c</sup> Academy of Mongolia Medicine, Inner Mongolia Medical University, No.5 Xinhua  
west street, Hohhot 010059, PR China.

#Dual contributors

**Table S1.** Performance comparison of CoO/HCN material with other representative host materials in literatures [13,19,33,47,48,50–56].

| Ref.      | Host material (morphology)                          | Current rate (C) | Cycle number | Capacity (mAh g <sup>-1</sup> ) | Capacity retention (%) |
|-----------|-----------------------------------------------------|------------------|--------------|---------------------------------|------------------------|
| This work | CoO nanocrystals embedded HCN                       | 0.2              | 200          | 996                             | 80.2                   |
|           |                                                     | 1.0              | 1000         | 629                             | 66.9                   |
|           |                                                     | 2.0              | 1000         | 482                             | 57.4                   |
| [17]      | Polypyrrole-MnO <sub>2</sub> Coaxial Nanotubes      | 1.0              | 500          | 550                             | 65.0                   |
| [23]      | cobalt and N-doped graphitic carbon                 | 1.0              | 500          | 625                             | 54.3                   |
| [37]      | TiO <sub>2</sub> coated N-doped graphene            | 1.0              | 500          | 628                             | 57.0                   |
| [51]      | Nitrogen-doped double-shelled hollow carbon spheres | 0.5              | 200          | 520                             | 62.0                   |
| [52]      | Nitrogen-doped hollow carbon nanospheres            | 0.2              | 100          | 980                             | 88.0                   |
| [54]      | PANI shell                                          | 0.2              | 200          | 780                             | 67.8                   |
| [55]      | PEDOT coated rGO/ZIF-8                              | 0.2              | 100          | 927                             | 70.8                   |
| [56]      | TiO <sub>2</sub> hollow spheres                     | 0.5              | 700          | 580                             | 53.1                   |
| [57]      | Hydrogen reduced TiO <sub>2</sub>                   | 0.2              | 200          | 890                             | 80.9                   |
| [58]      | TiN nanotube                                        | 0.5              | 500          | 644                             | 65.2                   |
| [59]      | Si/SiO <sub>2</sub> @C                              | 0.2              | 100          | 833                             | 78.2                   |

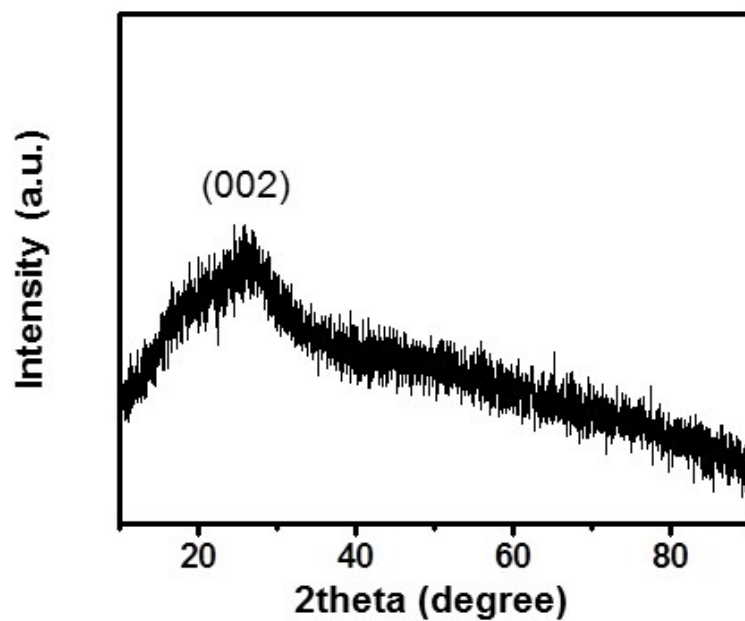

**Fig. S1.** XRD pattern of the HCN material, showing the typical diffraction peak of carbonaceous material.

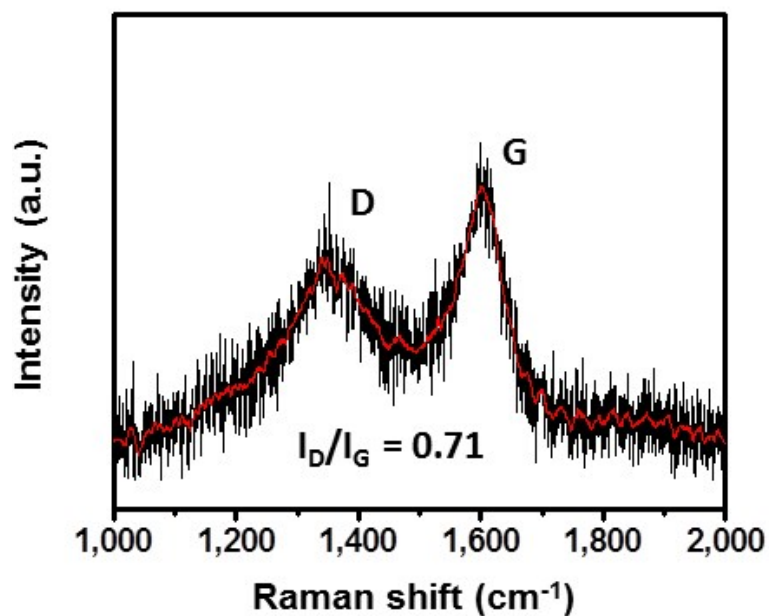

**Fig. S2.** Raman spectrum of the HCN material. The intensity ratio of D and G band is *ca.* 0.71, suggesting the moderate graphitic degree of carbon.

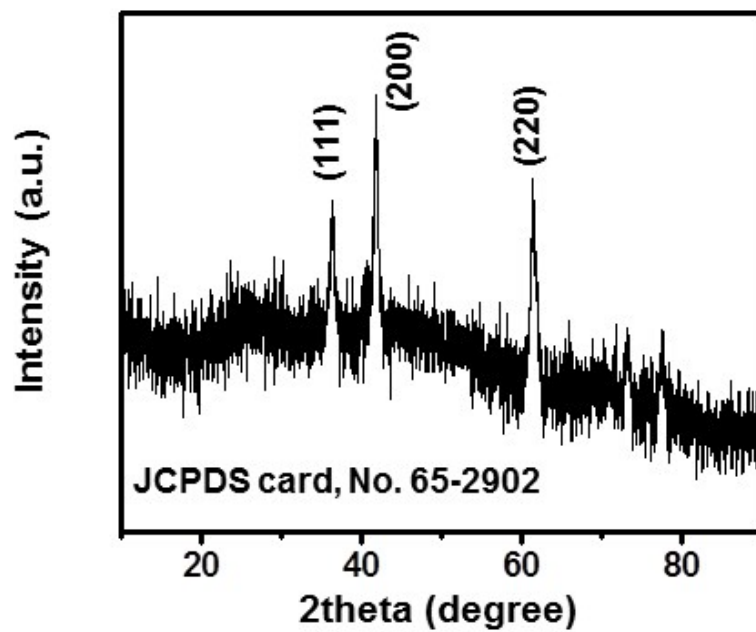

**Fig. S3.** XRD pattern of the CoO/HCN material. The observed diffraction peaks can be ascribed to the CoO (JCPDS card, No. 65-2902).

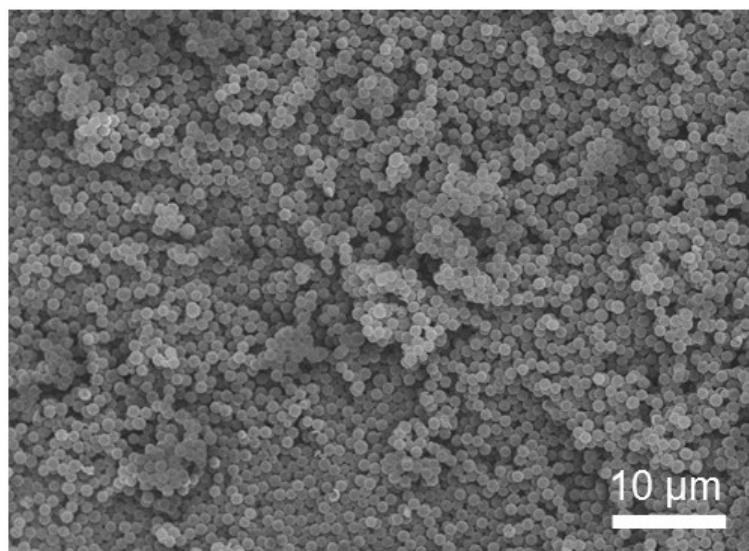

**Fig. S4.** SEM image of the SiO<sub>2</sub>@RF material. The SEM observation reveals the uniform distribution of SiO<sub>2</sub>@RF nanospheres.

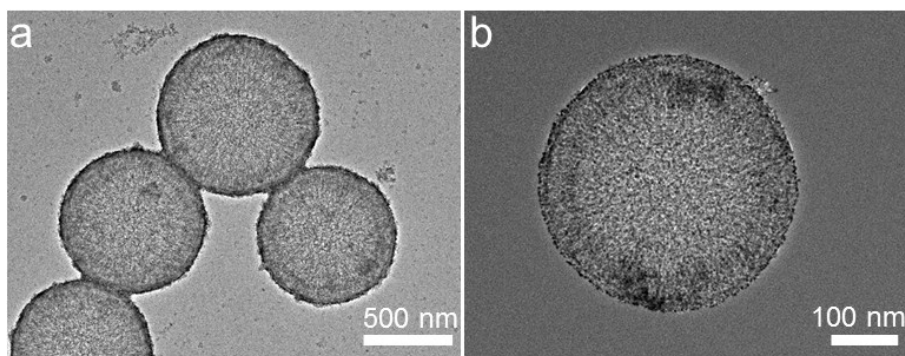

**Fig. S5.** TEM images of CoO/HCN-S composite, showing the morphology similar to that of CoO/HCN material.

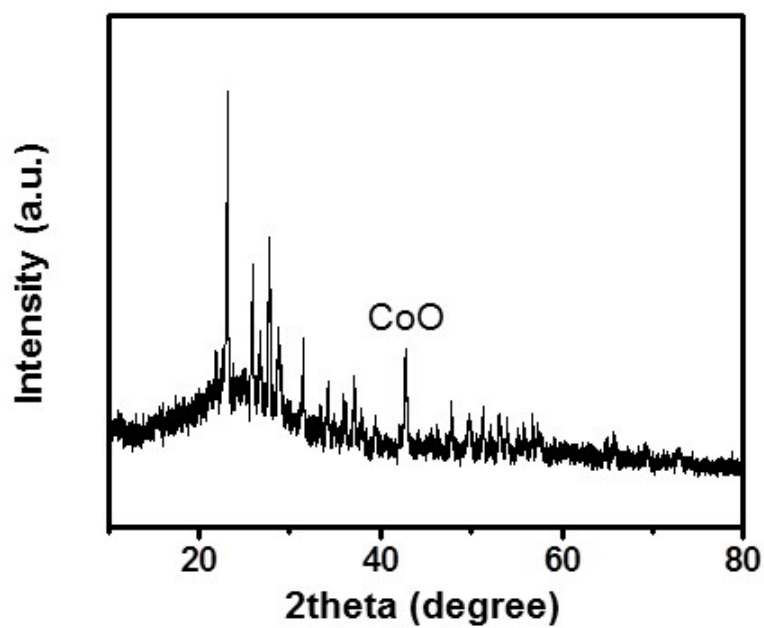

**Fig. S6.** XRD pattern of the CoO/HCN-S composite. The observed diffraction peaks can be ascribed to HCN material, CoO nanocrystals and sulfur powder.

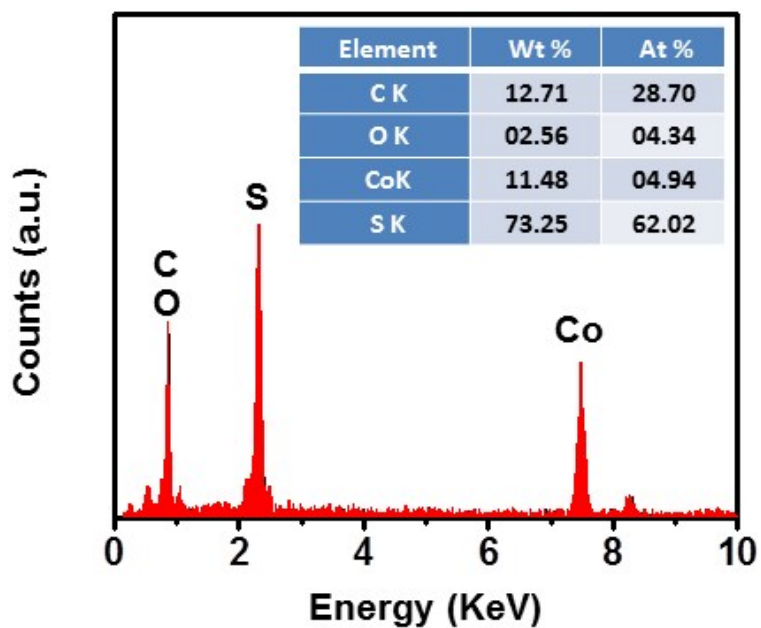

**Fig. S7.** EDX spectrum of the CoO/HCN-S composite. The EDX spectrum suggests the co-existence of C, Co, O and S elements, and the sulfur content was measured to be 73.3 wt.%.

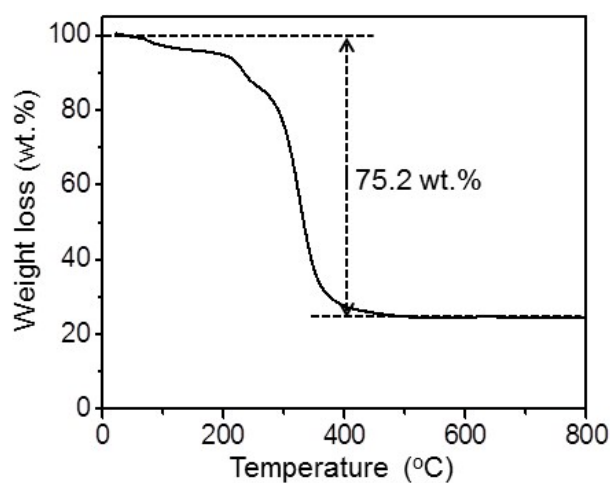

**Fig. S8.** TGA curve of CoO/HCN material annealed under air from room temperature to 800 °C.

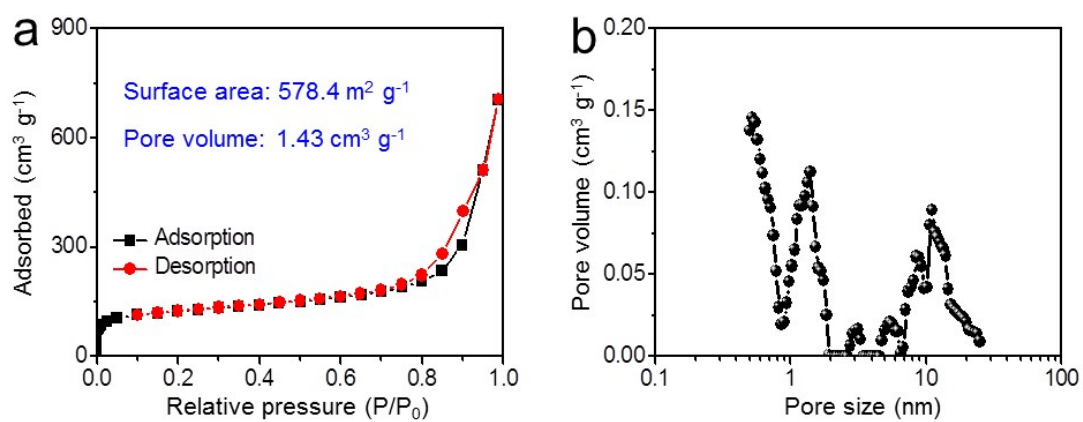

**Fig. S9.** (a)  $N_2$  adsorption/desorption isotherms and (b) pore size distribution of CoO/HCN material.

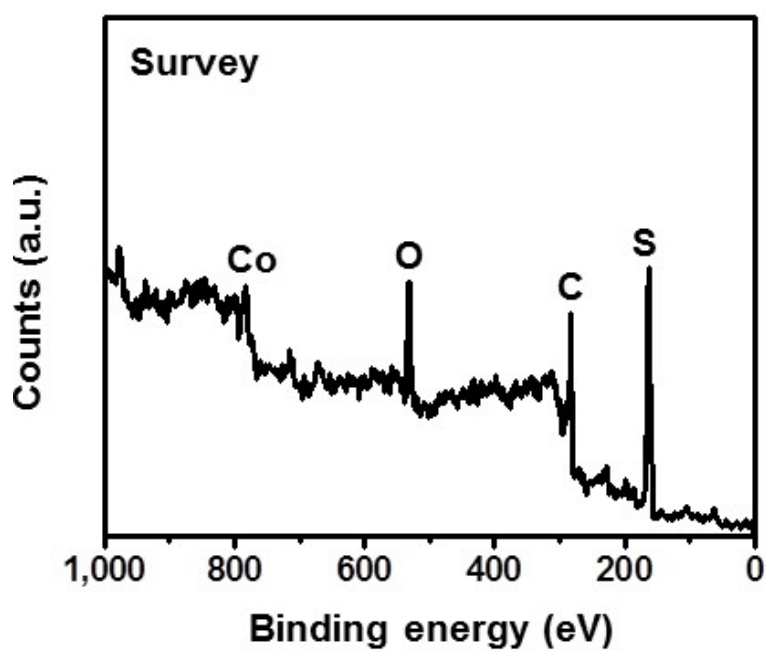

**Fig. S10.** Survey XPS spectrum of the CoO/HCN-S composite. C, Co, O and S elements are detected, consistent with the result of EDX spectrum.

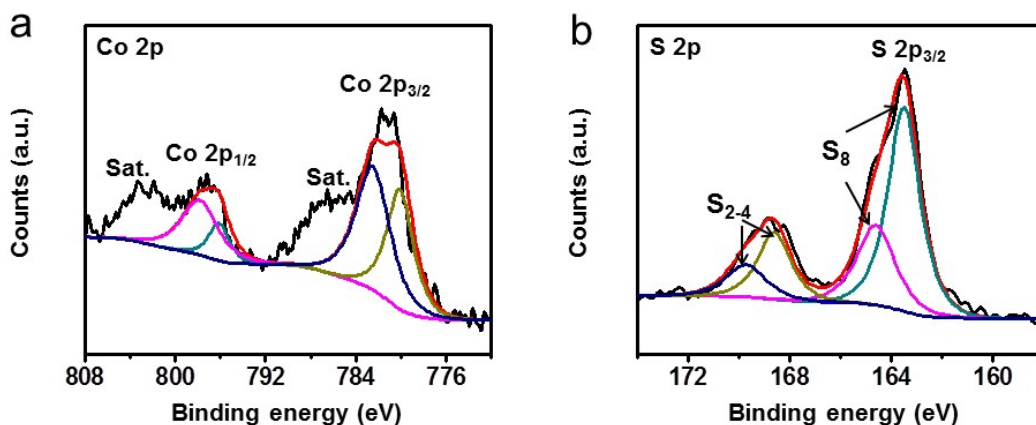

**Fig. S11.** XPS results of CoO/HCN-S composite. High-resolution XPS spectrum at (a) Co 2p region and (b) S 2p region.

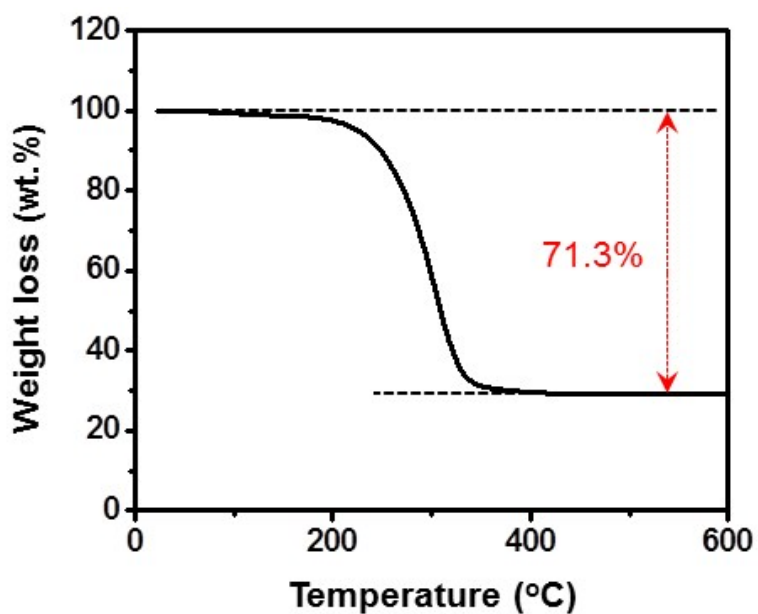

**Fig. S12.** Thermo gravimetric analysis (TGA) curve of CoO/HCN-S composite under N<sub>2</sub> atmosphere from room temperature to 600 °C with ramping rate of 10 °C/min. The sulfur content is determined to be 71.3 wt.%.



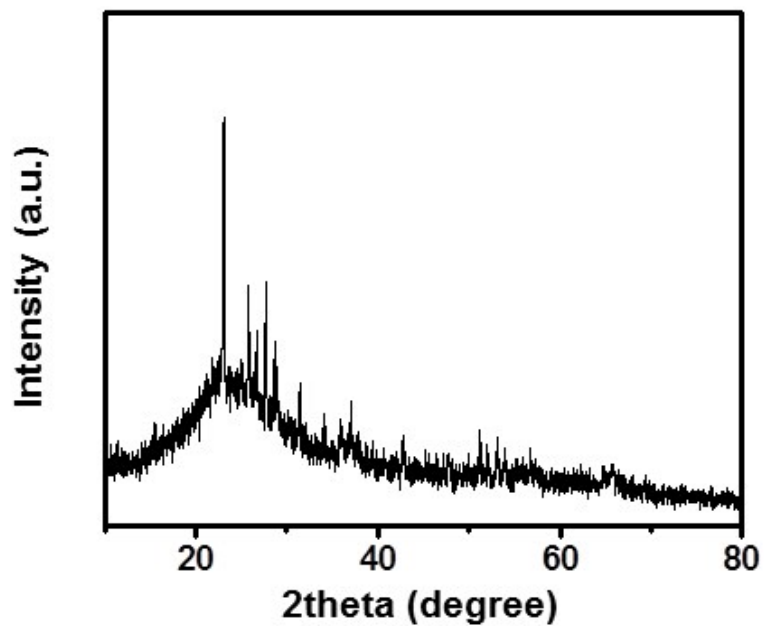

**Fig. S13.** XRD pattern of the HCN-S composite, indicating the existence of sulfur in HCN-S composite.

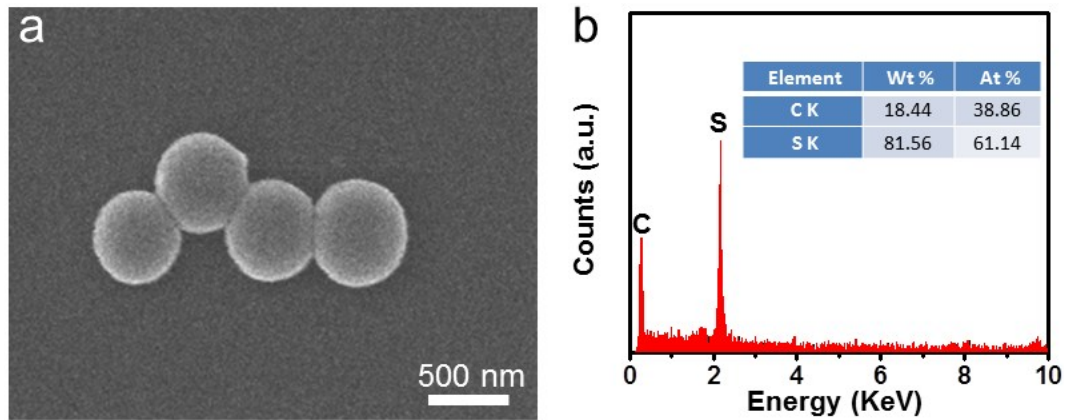

**Fig. S14.** Morphology and composition characterizations of HCN-S composite. (a) SEM image and (b) EDX spectrum of HCN-S composite.

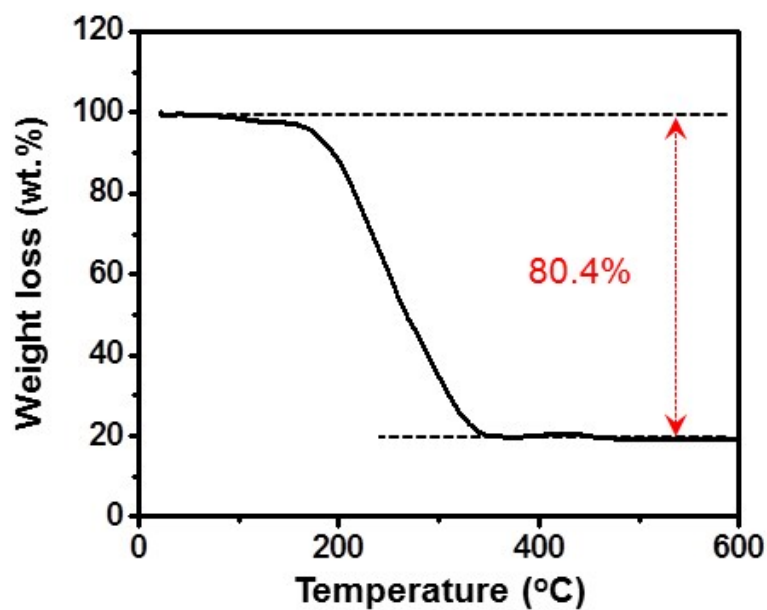

**Fig. S15.** TGA curve of HCN-S composite under  $N_2$  atmosphere from room temperature to 600 °C with ramping rate of 10 °C  $min^{-1}$ . The sulfur content is determined to be 80.4 wt.%.

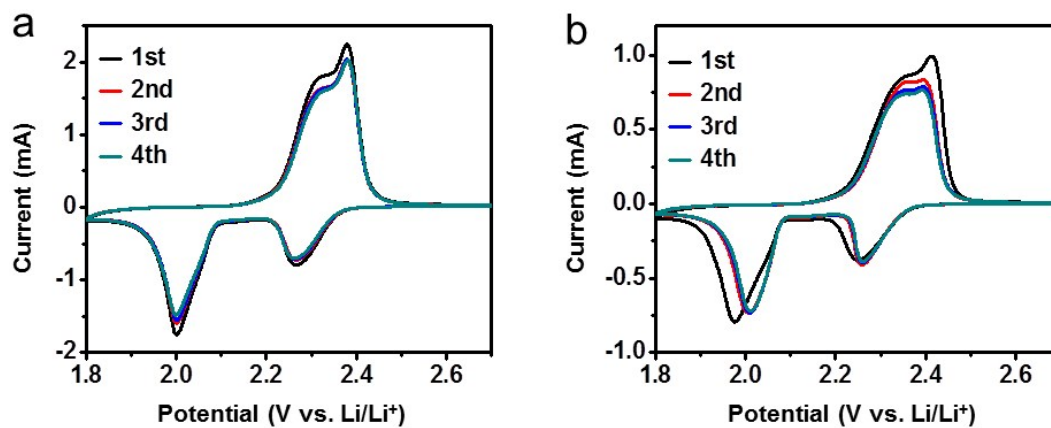

**Fig. S16.** CV curves of (a) CoO/HCN-S and (b) HCN-S composite cathodes at a scan rate of 0.2 mV  $s^{-1}$ .

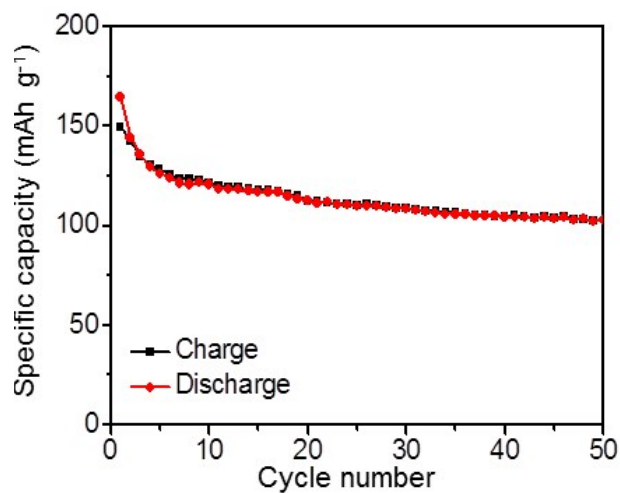

**Fig. S17.** Electrochemical performance of CoO/HCN material as anode in lithium-ion batteries at 100 mA g<sup>-1</sup>.

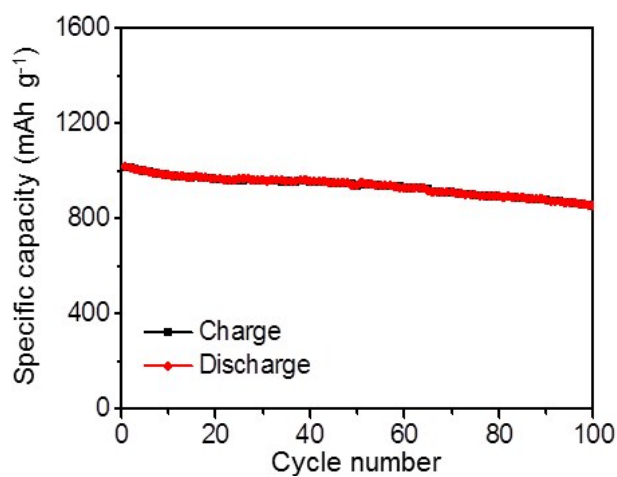

**Fig. S18.** Cycling performance of CoO/HCN-S composite cathode at 1.0 C in the electrolyte without LiNO<sub>3</sub> additive.

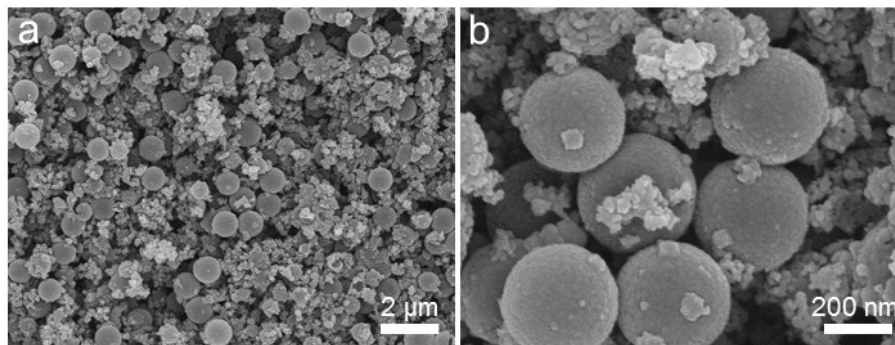

**Fig. S19.** (a,b) Morphology characterization of CoO/HCN-S composite after cycling for 1000 cycles at 2.0 C. The SEM observations reveal the structure similar to that of CoO/HCN material, indicating its highly structural integrity.
